# Supplementary material
Source: PubMed Central journal article supplement (PMC5441718)

Control

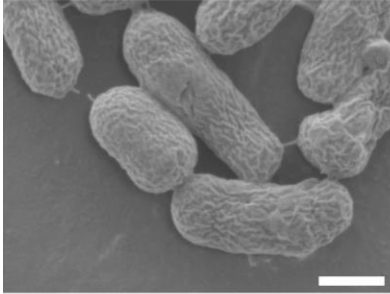

NCR168pl 3.61

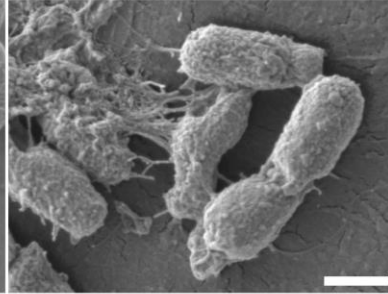

NCR095 pl 3.62

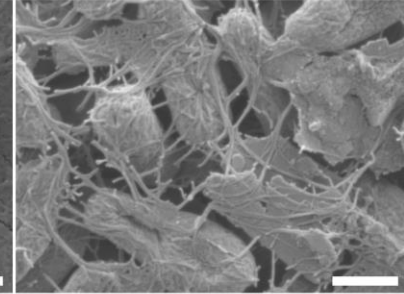

NCR162pl 3.7

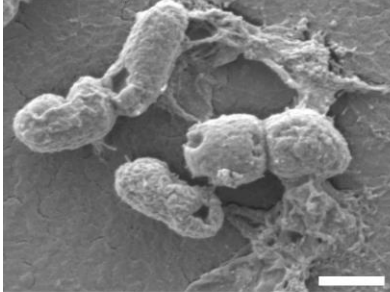

NCR209pl 4.5

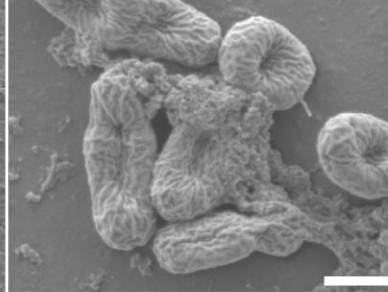

NCR001 pl 5

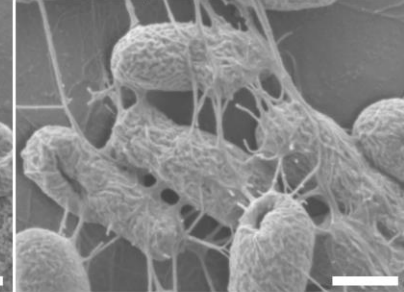

NCR084pl 6.7

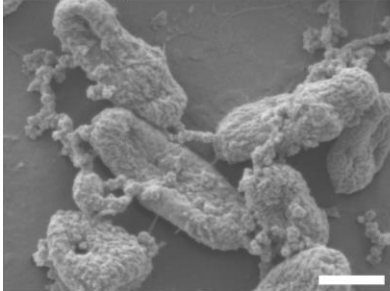

NCR121pl 6.7

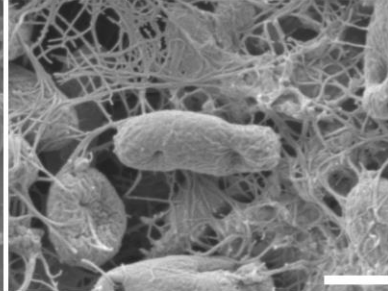

NCR124 pl 6.9

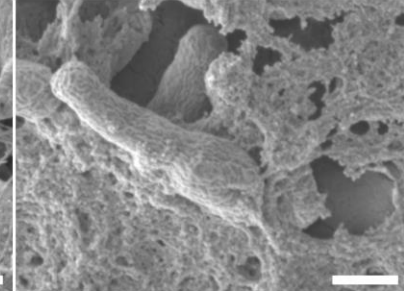

NCR200pl 8.3

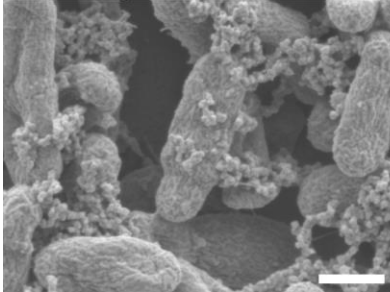

NCR169pl 8.4

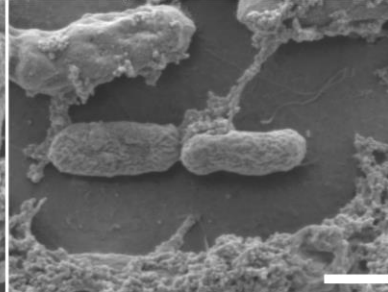

NCR057 pl 8.9

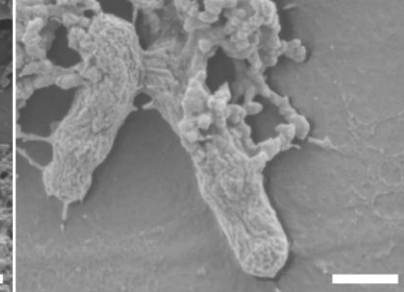

NCR055 pl 9.2

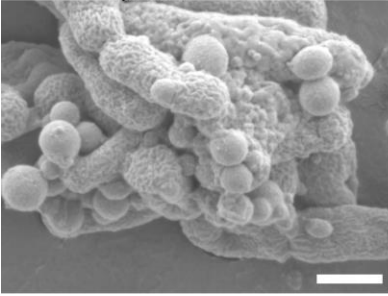

NCR119 pl 9.3

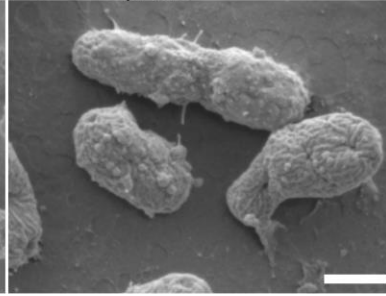

NCR035 pl 9.4

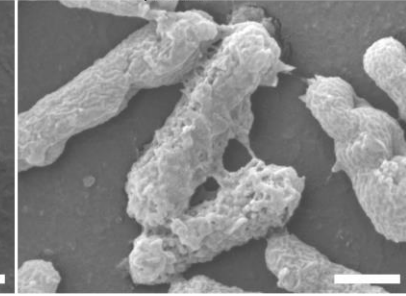

NCR137 pl 9.7

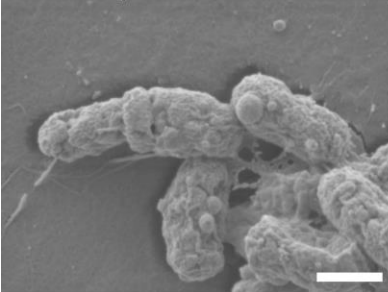

NCR192 pl 9.7

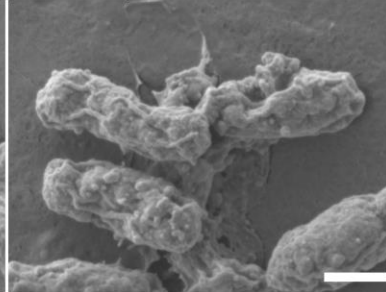

NCR147 pl 9.7

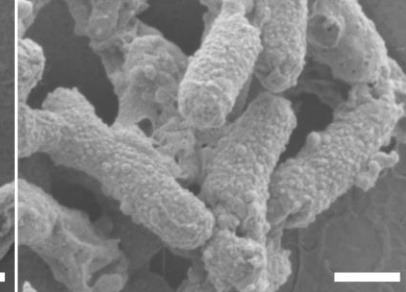

NCR032 pl 9.8

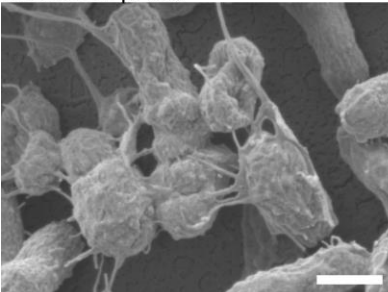

NCR280 pl 9.8

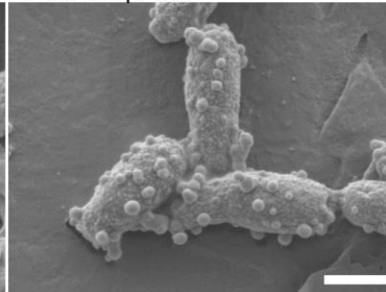

NCR183 pl 10.1

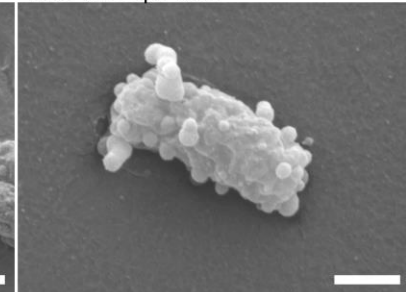

NCR247 pl 10.1

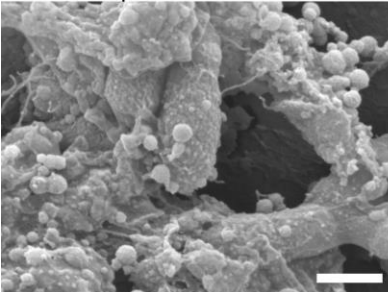

NCR044 pl 10.6

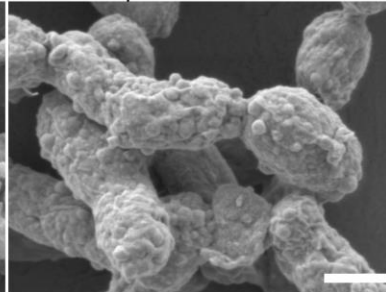

NCR335 pl 11.2

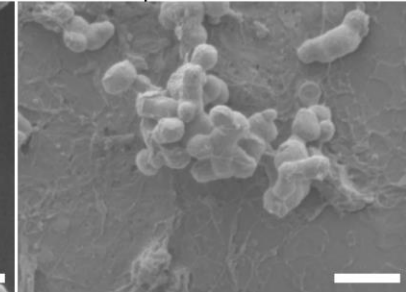

Supplement: pnas.1704217114.sfig06.pdf [file pnas.1704217114.sfig06.pdf]
