# Supplementary material
Source: PubMed Central journal article supplement (PMC5441718)

■ *G. uralensis*   
 ■ *O. lamberti*   
 ■ *C. arietinum*   
 ■ *A. canadensis*   
 ■ *O. viciifolia*  
■ *O. spinosa*   
 ■ *G. orientalis*   
 ■ *P. sativum*   
■ *M. sativa*   
■ *M. truncatula*

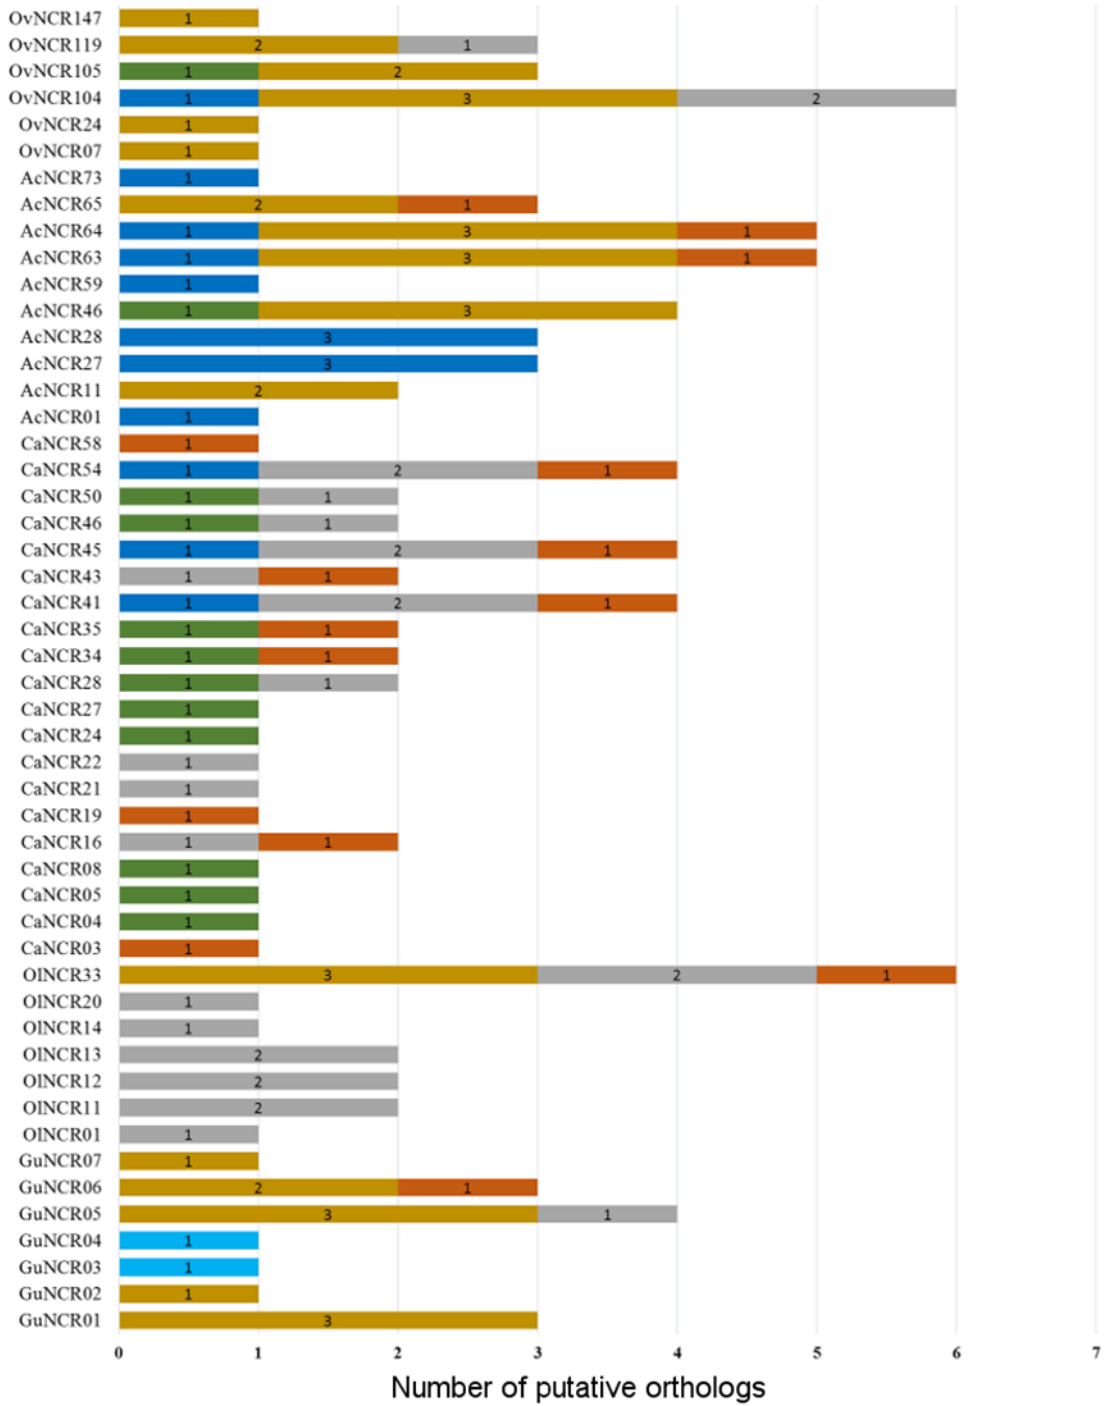

Supplement: pnas.1704217114.sfig03.pdf [file pnas.1704217114.sfig03.pdf]
