# Supplementary material
Source: PubMed Central journal article supplement (PMC5441718)
Supplement: pnas.1704217114.sfig04.pdf [file pnas.1704217114.sfig04.pdf]

# **Oxytropis lamberti**

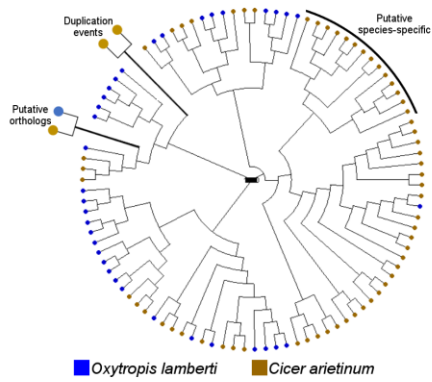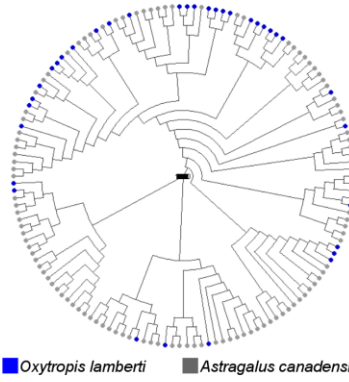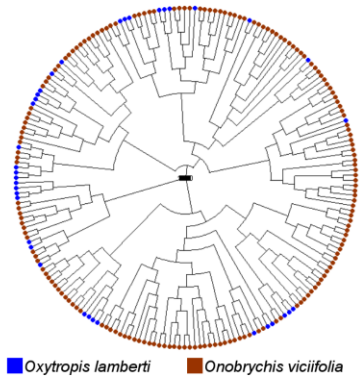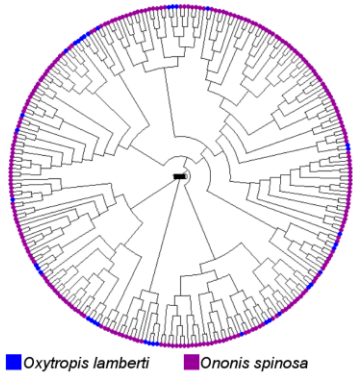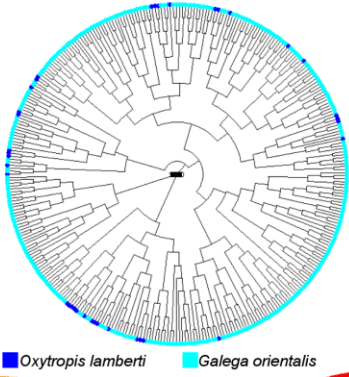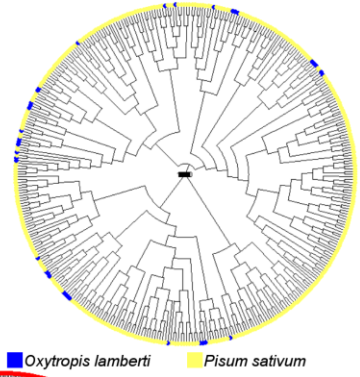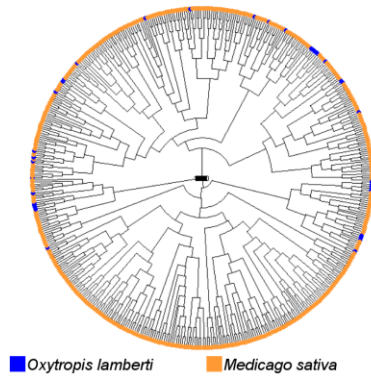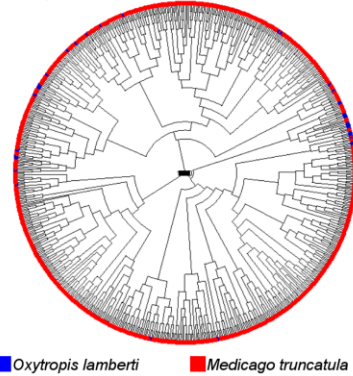

■ *Cicer arietinum*

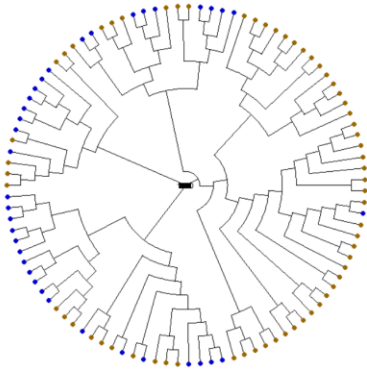

■ *Cicer arietinum* ■ *Oxytropis lamberti*

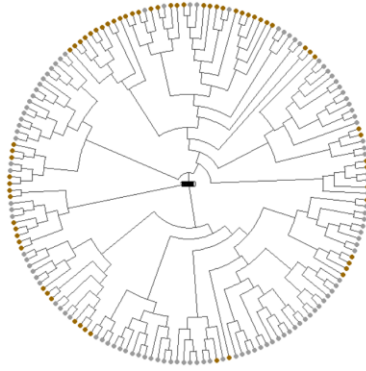

■ *Cicer arietinum* ■ *Astragalus canadensis*

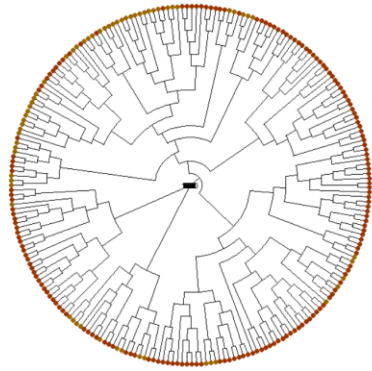

■ *Cicer arietinum* ■ *Onobrychis viciifolia*

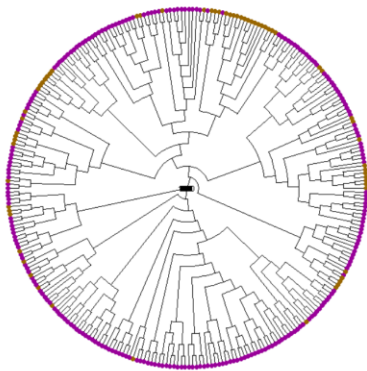

■ *Cicer arietinum* ■ *Ononis spinosa*

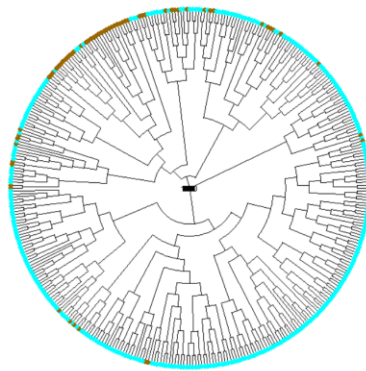

■ *Cicer arietinum* ■ *Galega orientalis*

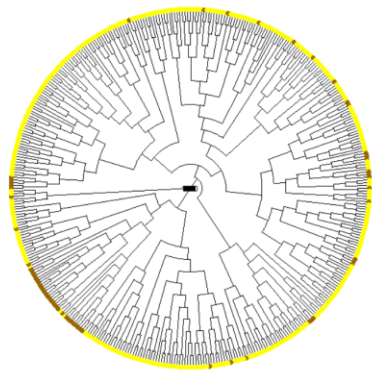

■ *Cicer arietinum* ■ *Pisum sativum*

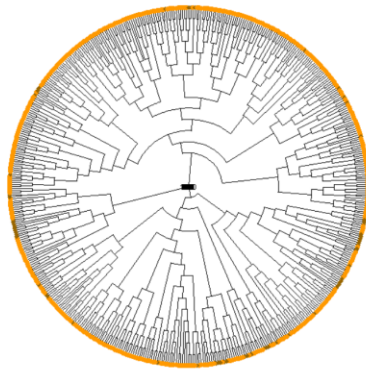

■ *Cicer arietinum* ■ *Medicago sativa*

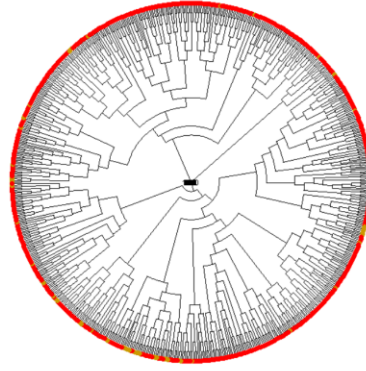

■ *Cicer arietinum* ■ *Medicago truncatula*

# ■ *Astragalus canadensis*

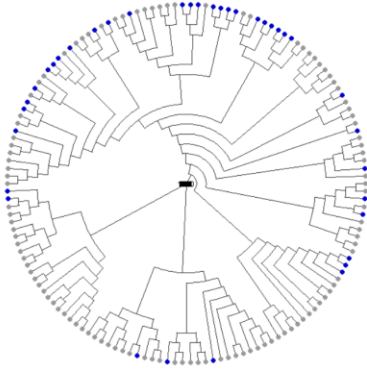

■ *Astragalus canadensis* ■ *Oxytropis lamberti*

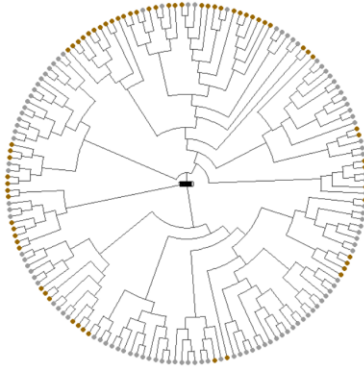

■ *Astragalus canadensis* ■ *Cicer arietinum*

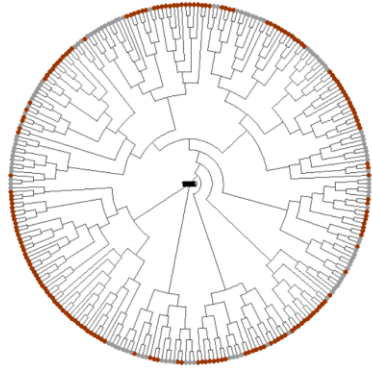

■ *Astragalus canadensis* ■ *Onobrychis viciifolia*

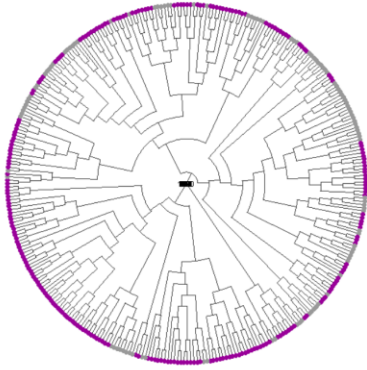

■ *Astragalus canadensis* ■ *Ononis spinosa*

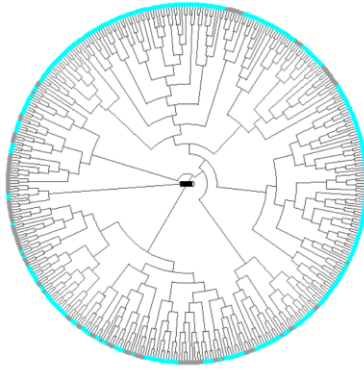

■ *Astragalus canadensis* ■ *Galega orientalis*

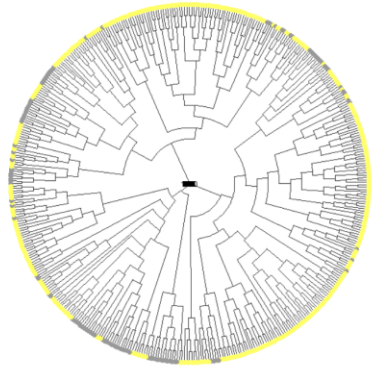

■ *Astragalus canadensis* ■ *Pisum sativum*

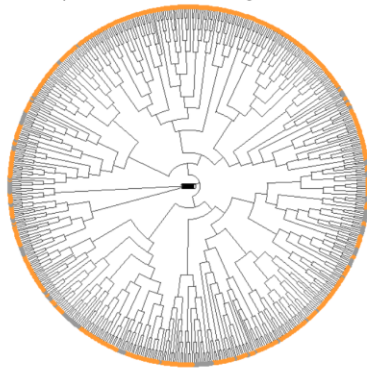

■ *Astragalus canadensis* ■ *Medicago sativa*

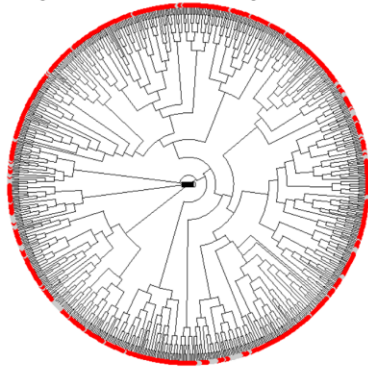

■ *Astragalus canadensis* ■ *Medicago truncatula*



■ *Onobrychis viciifolia*

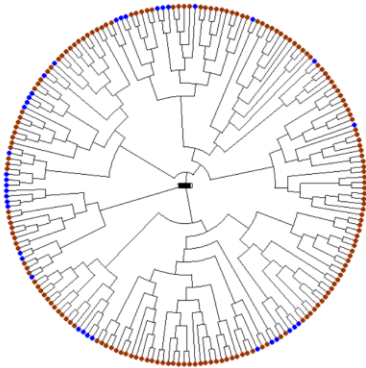

■ *Onobrychis viciifolia* ■ *Oxytropis lamberti*

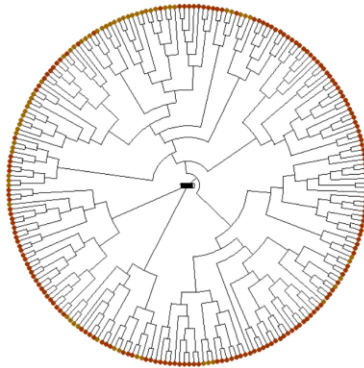

■ *Onobrychis viciifolia* ■ *Cicer arietinum*

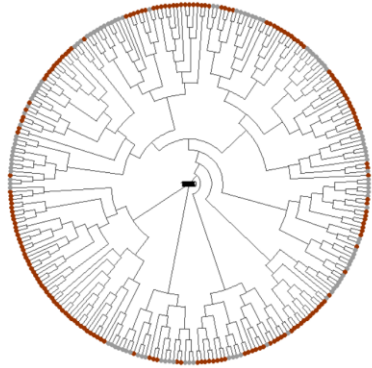

■ *Onobrychis viciifolia* ■ *Astragalus canadensis*

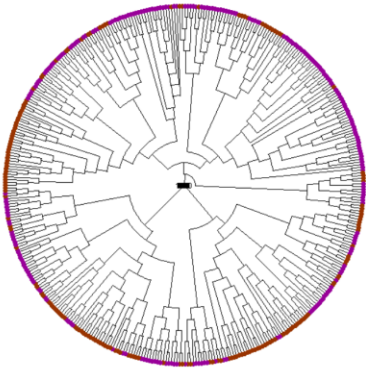

■ *Onobrychis viciifolia* ■ *Ononis spinosa*

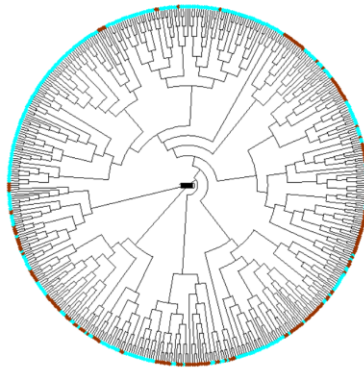

■ *Onobrychis viciifolia* ■ *Galega orientalis*

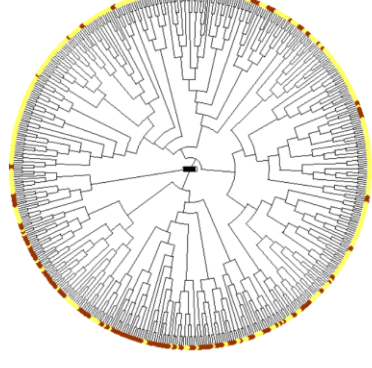

■ *Onobrychis viciifolia* ■ *Pisum sativum*

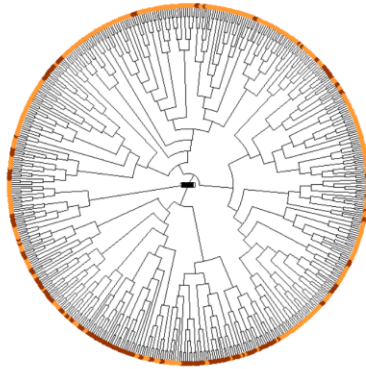

■ *Onobrychis viciifolia* ■ *Medicago sativa*

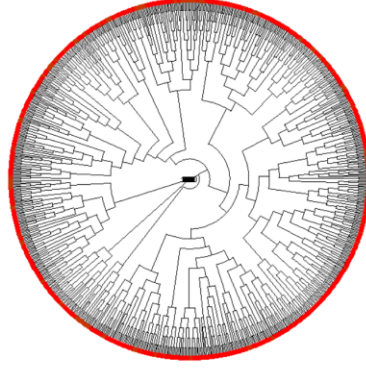

■ *Onobrychis viciifolia* ■ *Medicago truncatula*

■ *Ononis spinosa*

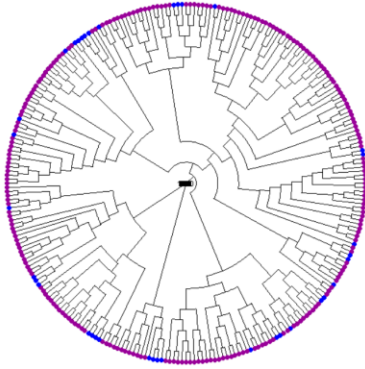

■ *Ononis spinosa* ■ *Oxytropis lamberti*

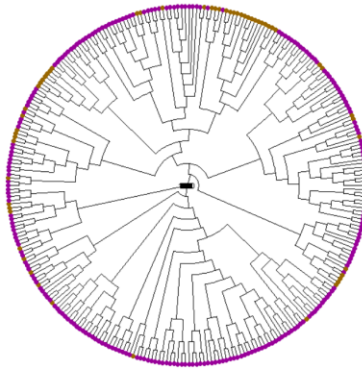

■ *Ononis spinosa* ■ *Cicer arietinum*

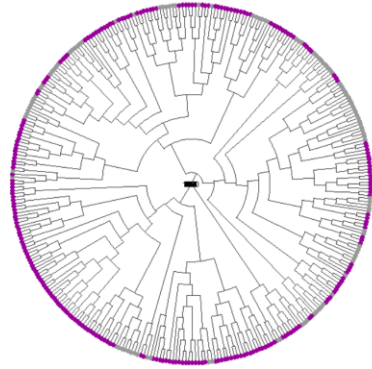

■ *Ononis spinosa* ■ *Astragalus canadensis*

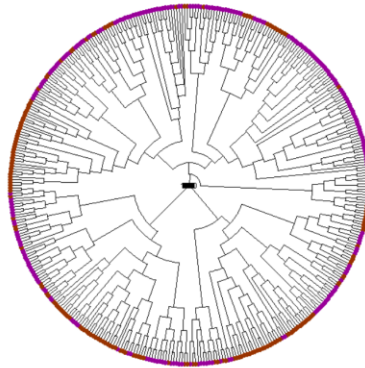

■ *Ononis spinosa* ■ *Onobrychis viciifolia*

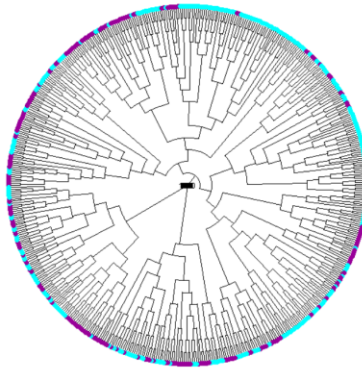

■ *Ononis spinosa* ■ *Galega orientalis*

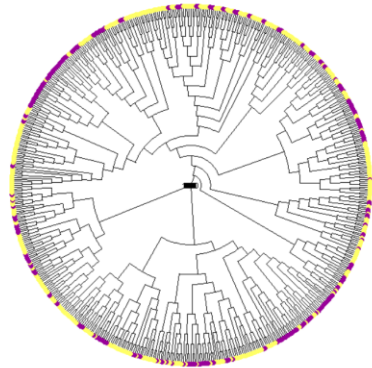

■ *Ononis spinosa* ■ *Pisum sativum*

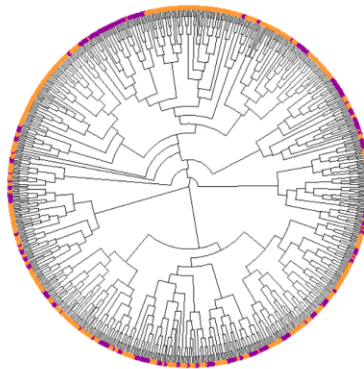

■ *Ononis spinosa* ■ *Medicago sativa*

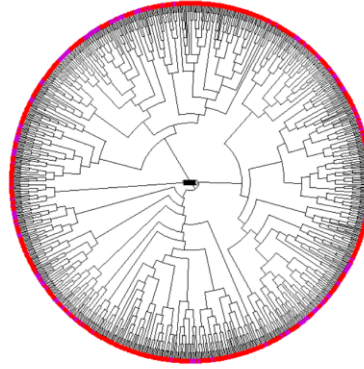

■ *Ononis spinosa* ■ *Medicago truncatula*

**Galega orientalis**

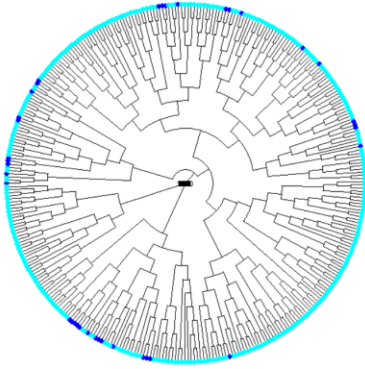

**Galega orientalis** **Oxytropis lamberti**

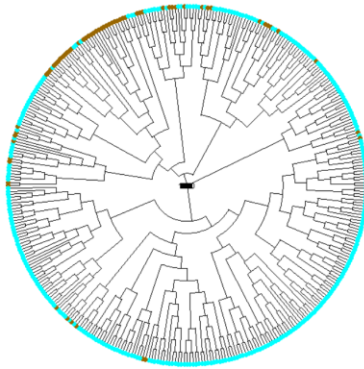

**Galega orientalis** **Cicer arietinum**

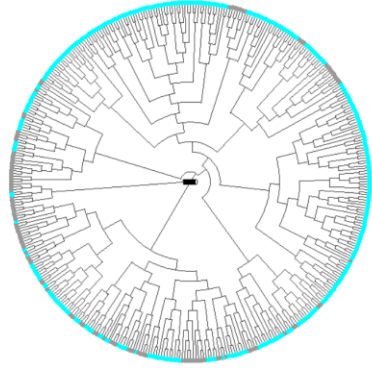

**Galega orientalis** **Astragalus canadensis**

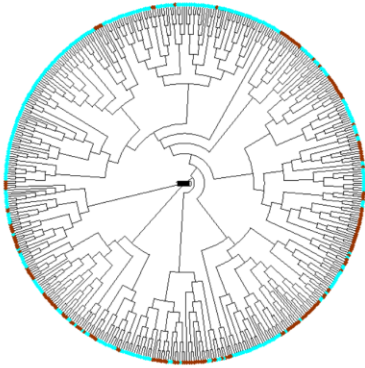

**Galega orientalis** **Onobrychis viciifolia**

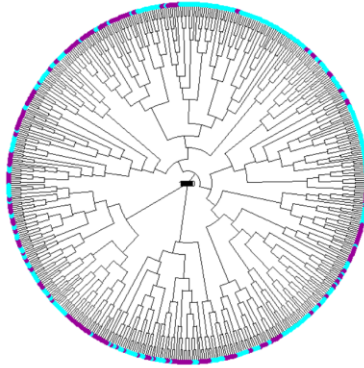

**Galega orientalis** **Ononis spinosa**

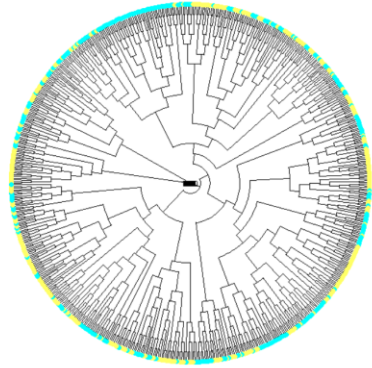

**Galega orientalis** **Pisum sativum**

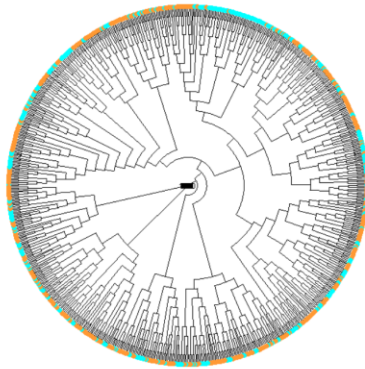

**Galega orientalis** **Medicago sativa**

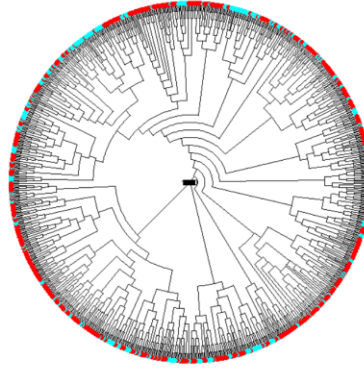

**Galega orientalis** **Medicago truncatula**



**Pisum sativum**

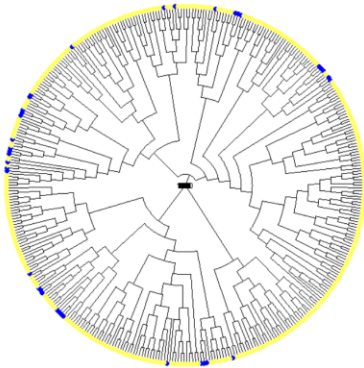

**Pisum sativum** **Oxytropis lamberti**

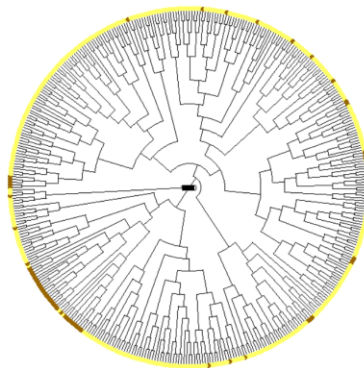

**Pisum sativum** **Cicer arietinum**

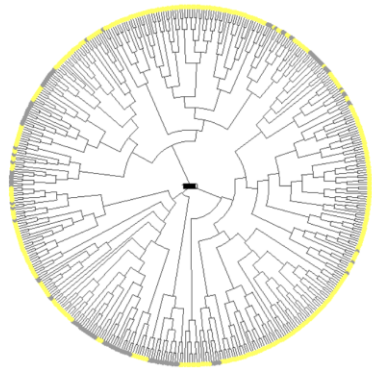

**Pisum sativum** **Astragalus canadensis**

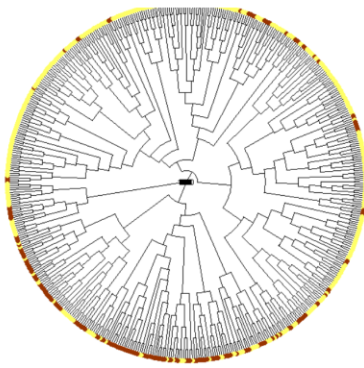

**Pisum sativum** **Onobrychis viciifolia**

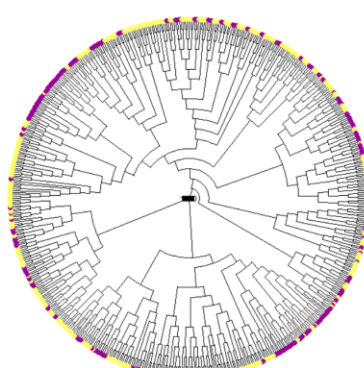

**Pisum sativum** **Ononis spinosa**

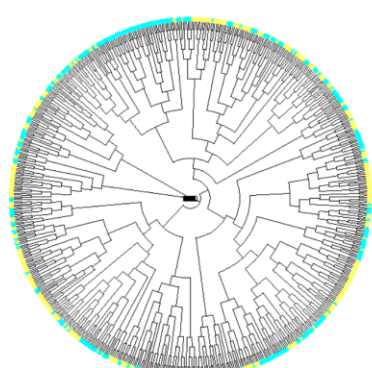

**Pisum sativum** **Galega orientalis**

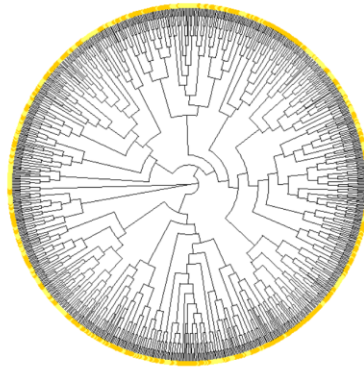

**Pisum sativum** **Medicago sativa**

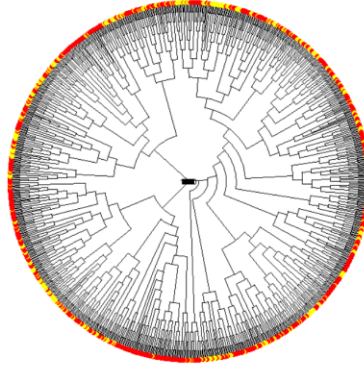

**Pisum sativum** **Medicago truncatula**

**Medicago sativa**

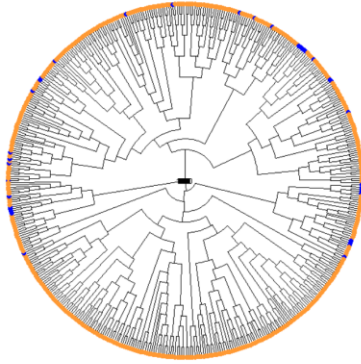

Medicago sativa Oxytropis lamberti

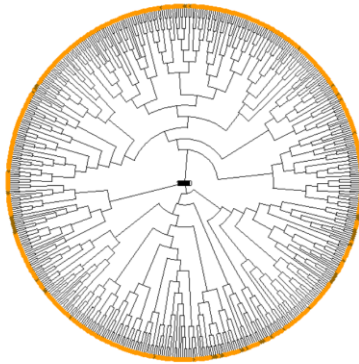

Medicago sativa Cicer arietinum

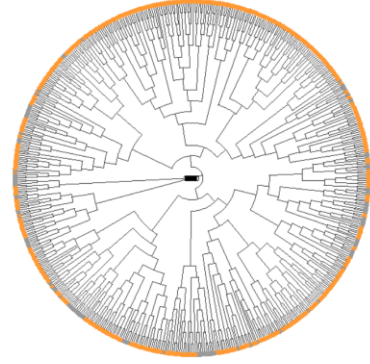

Medicago sativa Astragalus canadensis

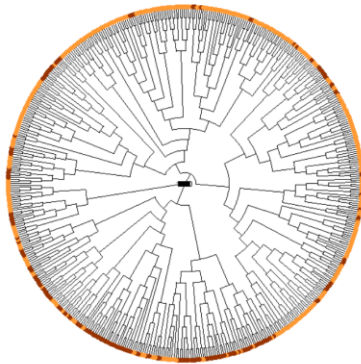

Medicago sativa Onobrychis viciifolia

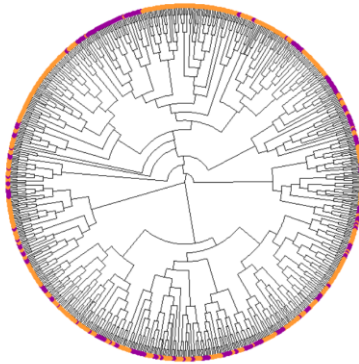

Medicago sativa Ononis spinosa

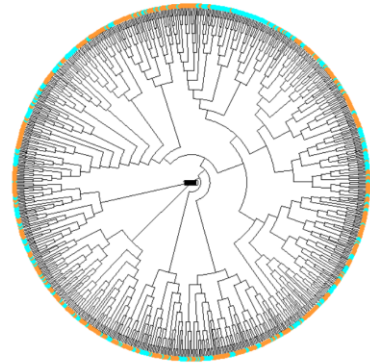

Medicago sativa Galega orientalis

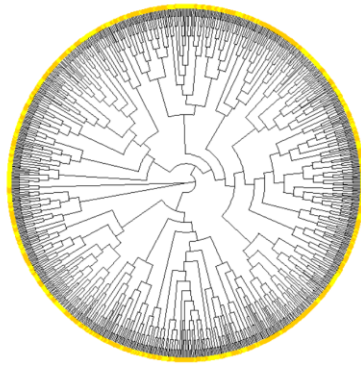

Medicago sativa Pisum sativum

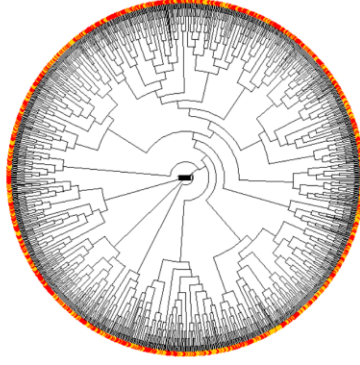

Medicago sativa Medicago truncatula



**Medicago truncatula**

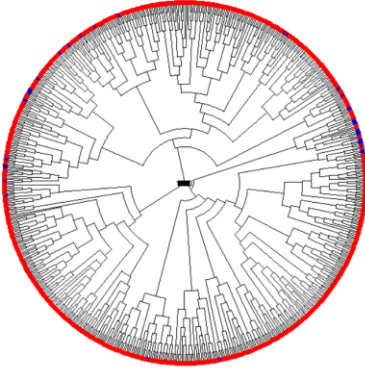

■ *Medicago truncatula* ■ *Oxytropis lamberti*

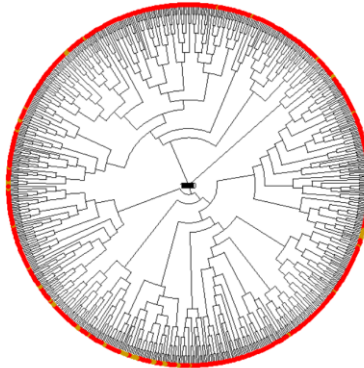

■ *Medicago truncatula* ■ *Cicer arietinum*

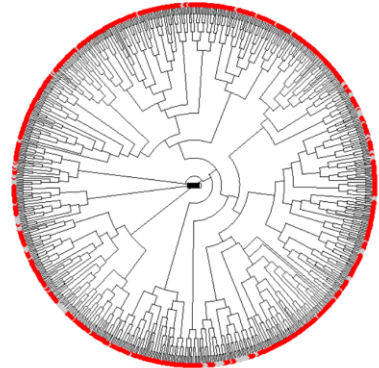

■ *Medicago truncatula* ■ *Astragalus canadensis*

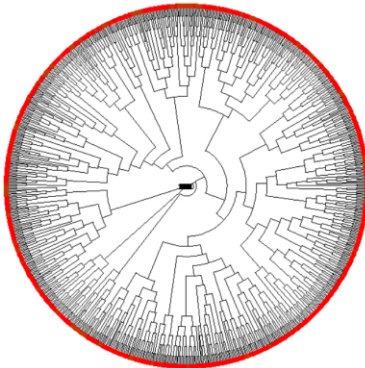

■ *Medicago truncatula* ■ *Onobrychis viciifolia*

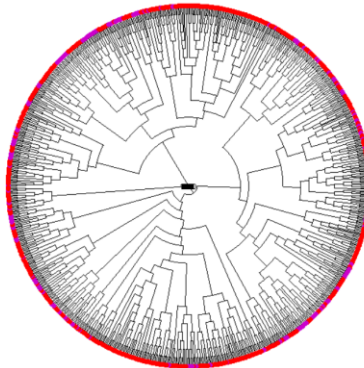

■ *Medicago truncatula* ■ *Ononis spinosa*

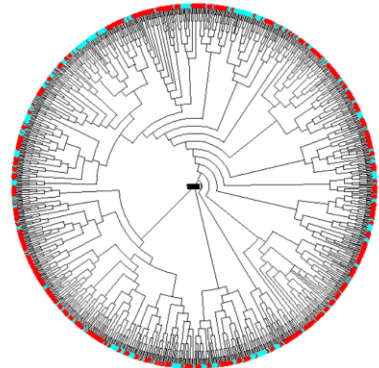

■ *Medicago truncatula* ■ *Galega orientalis*

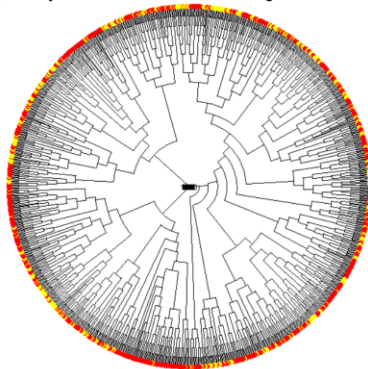

■ *Medicago truncatula* ■ *Pisum sativum*

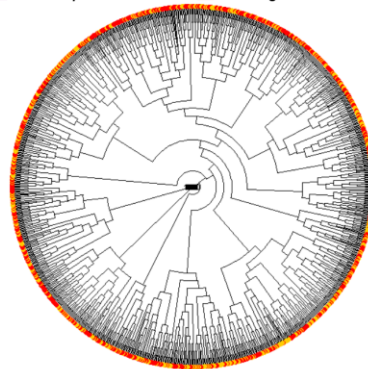

■ *Medicago truncatula* ■ *Medicago sativa*
