# Supplementary material
Source: PubMed Central journal article supplement (PMC5441718)

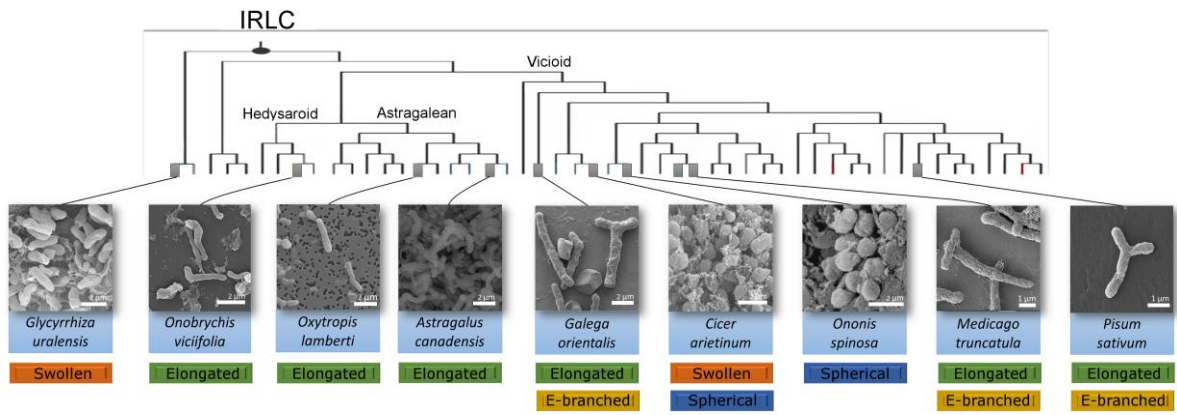

Supplement: pnas.1704217114.sfig01.pdf [file pnas.1704217114.sfig01.pdf]

A

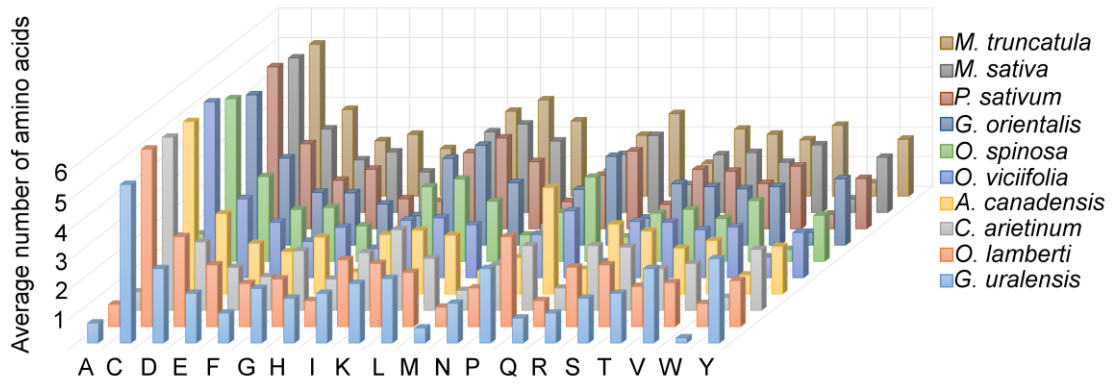

B

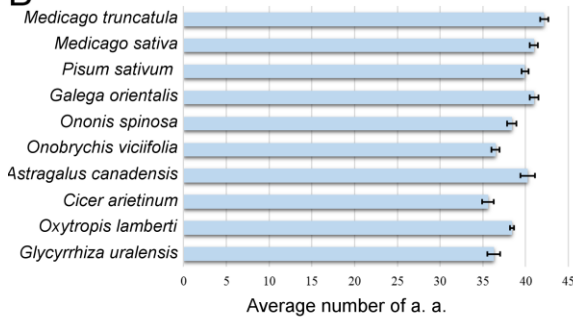

C

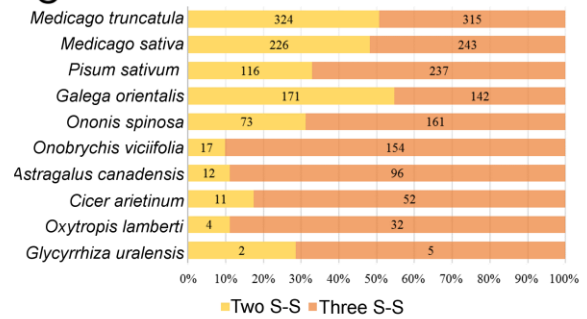

D

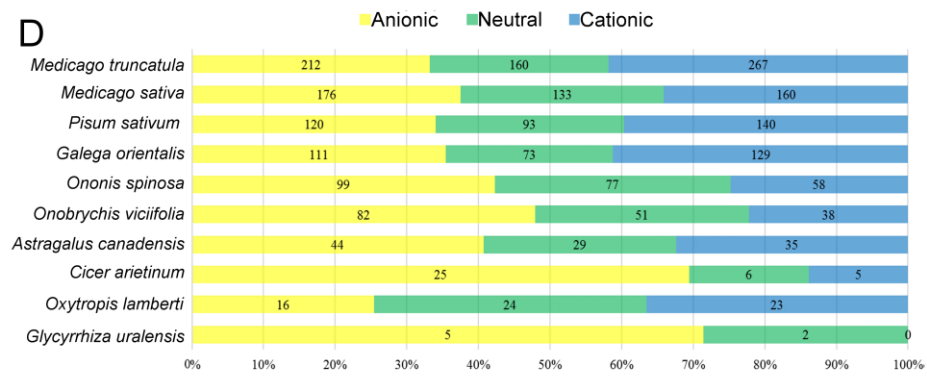

Supplement: pnas.1704217114.sfig02.pdf [file pnas.1704217114.sfig02.pdf]

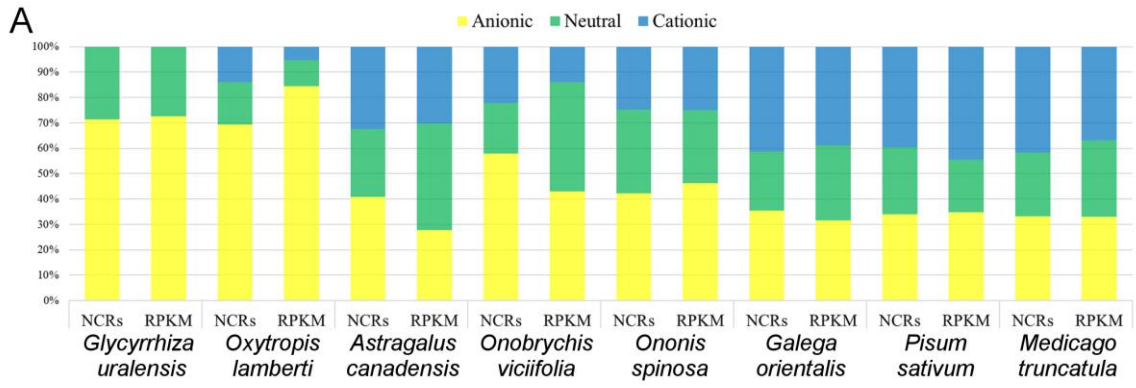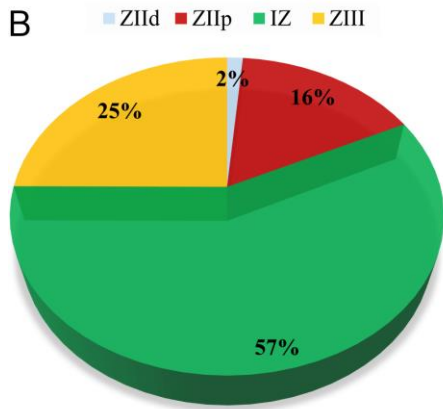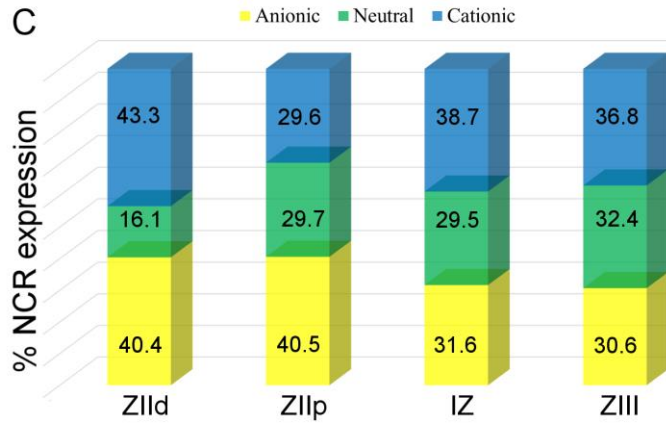

Supplement: pnas.1704217114.sfig05.pdf [file pnas.1704217114.sfig05.pdf]

*Glycyrrhiza uralensis*

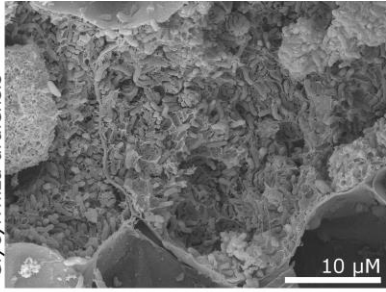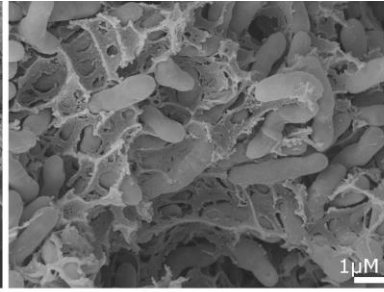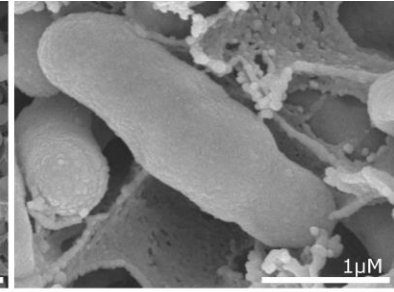

*Cicer arietinum*

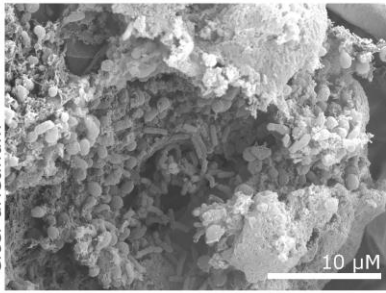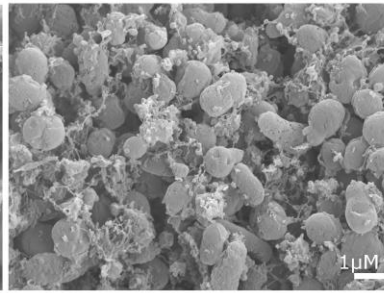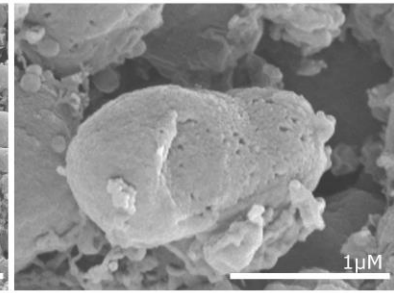

*Galega orientalis*

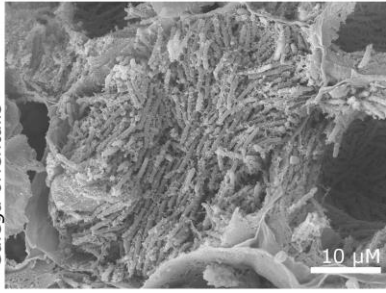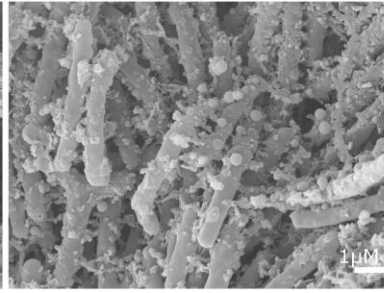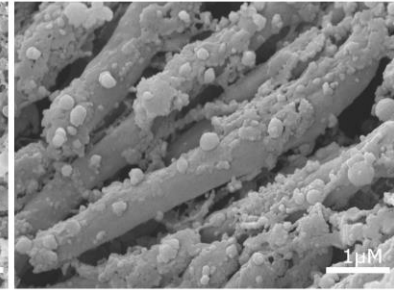

*Medicago truncatula*

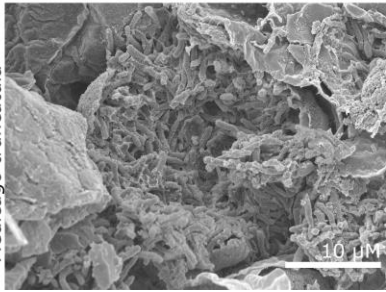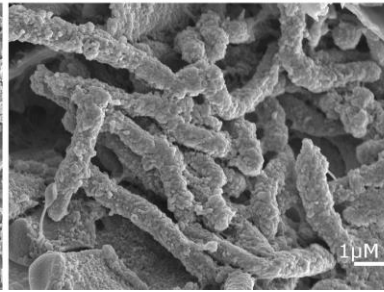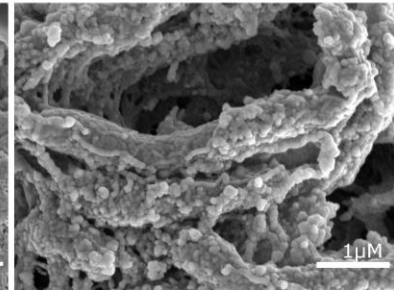

Supplement: pnas.1704217114.sfig07.pdf [file pnas.1704217114.sfig07.pdf]

Control

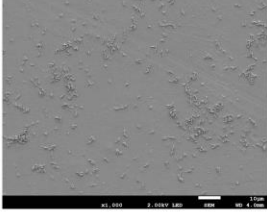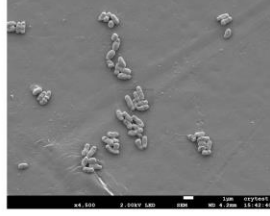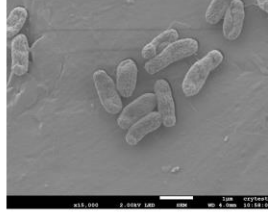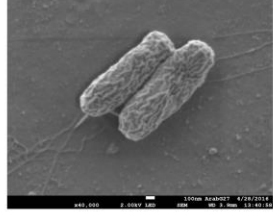

8µM NCR

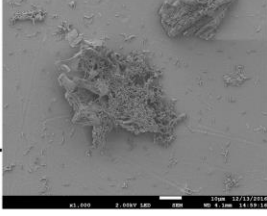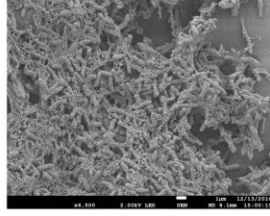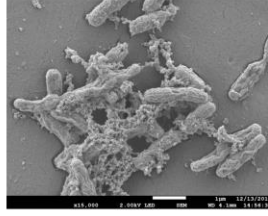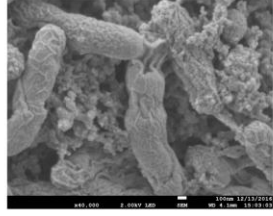

16µM NCR

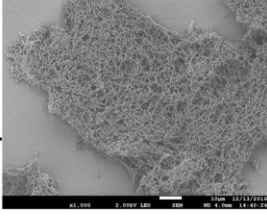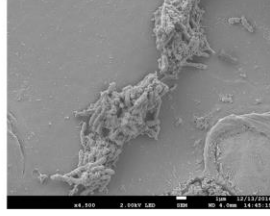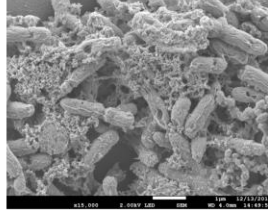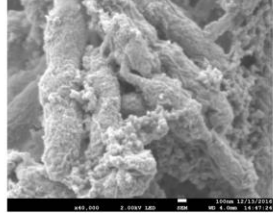

Supplement: pnas.1704217114.sfig08.pdf [file pnas.1704217114.sfig08.pdf]

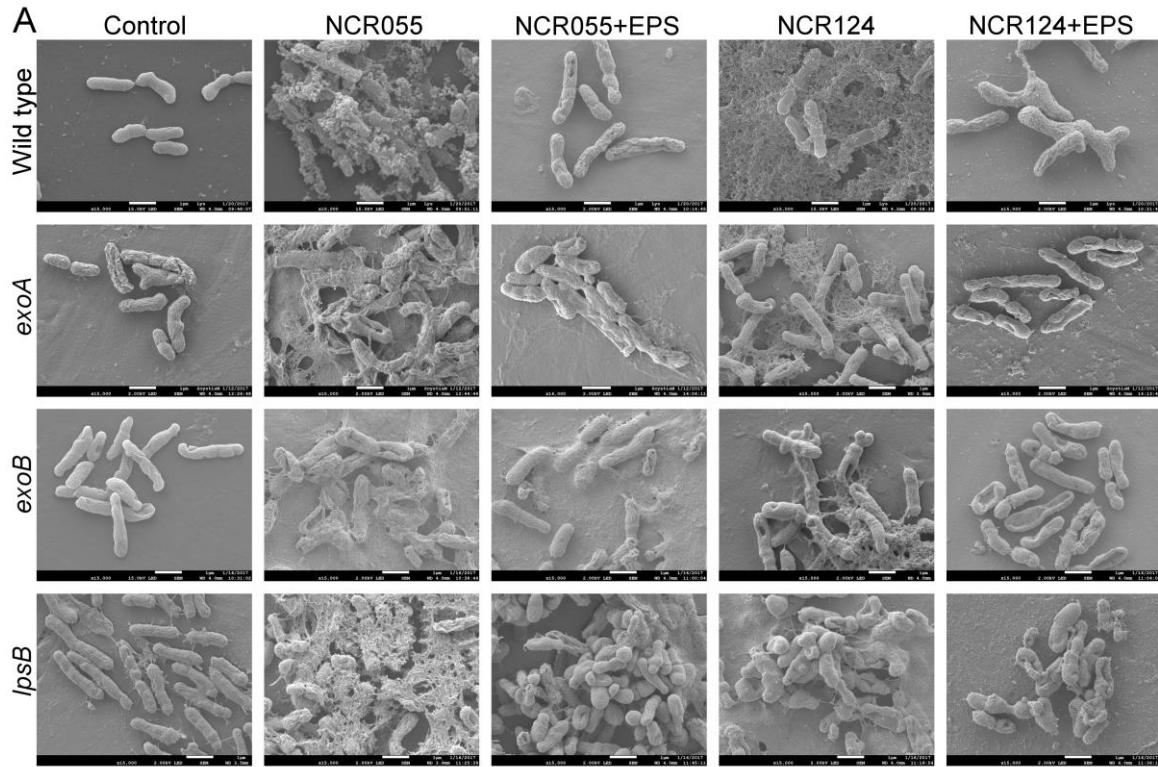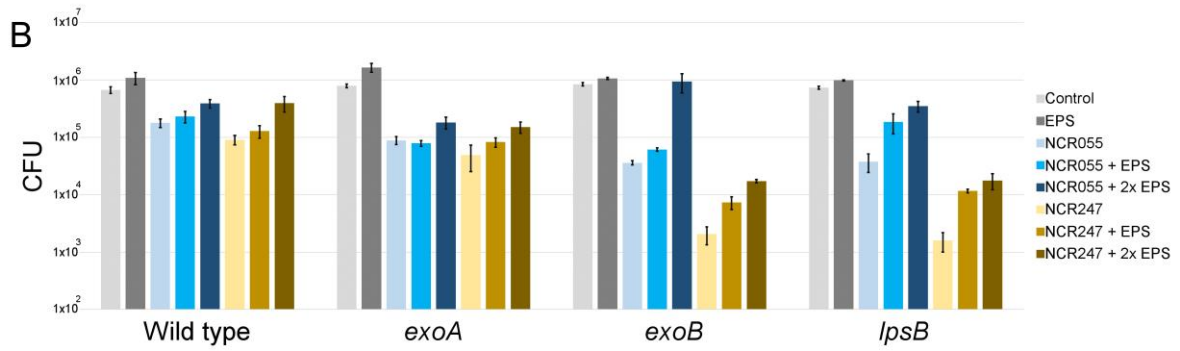

Supplement: pnas.1704217114.sfig09.pdf [file pnas.1704217114.sfig09.pdf]

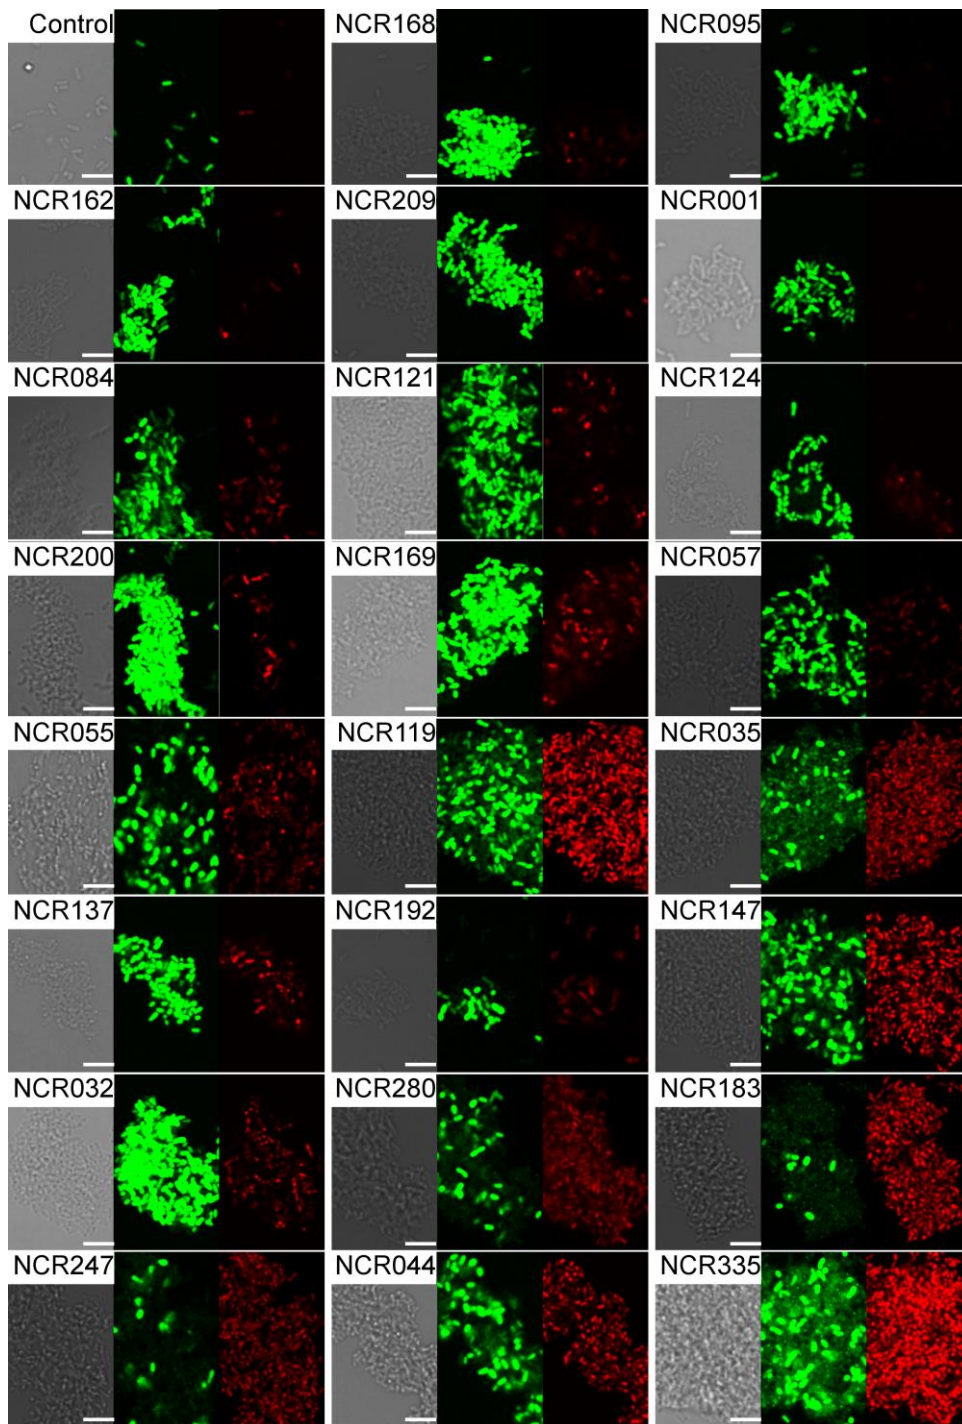

Supplement: pnas.1704217114.sfig10.pdf [file pnas.1704217114.sfig10.pdf]
